# Supplementary material
Source: publisher figshare collection journal article supplement (https://gsajournals.figshare.com/ndownloader/files/13311662)
Supplement: Supplementary file 1 [file 13311662]

## Sheet: Sheet1
Supplemental Table 1. List of strains used in this study
Name	Genotype	Source
N2	Wild Type	CGC
YY565	oma-1(zu405) IV; mjIS31(pie-1::gfp::h2b) II	This study
YY640	hrde-1(tm1200) III; mjIS31 II	Buckley et.al.
YY942	heri-1(gg539) II; oma-1(zu405) IV; mjIS31 II	This study
YY941	heri-1(gg538) II; oma-1(zu405) IV; mjIS31 II	This study
YY940	heri-1(gg537) II; oma-1(zu405) IV; mjIS31 II	This study
YY939	heri-1(gg526) II; oma-1(zu405) IV; mjIS31 II	This study
YY1032	heri-1(gk961392) II ox=4	This study
YY1112	heri-1::3xflag II	This study
YY1218	cec-9(gk961392) II;mjIS31 II	This study
YY1224	heri-1::3xflag II; hrde-1(tm1200) III	This study
YY1228	heri-1::3xflag II; hrde-3(gg546) I	This study
YY1481	heri-1::gfp::3xflag II	This study
YY1500	heri-1::gfp II;mcherry::h2b	This study
YY1642	heri-1(gk961392) II; hrde-1(tm1200) III; mjIS31 II	This study
VC40608	cec-9(gk961392) II	Million Mutation Project
SX461	mjIS31(pie-1::gfp::h2b) II	Bagijn et.al.
YY1510	heri-1::gfp::3xflag II; pgl-1::3xflag::gfp IV]	This study
